# Supplementary material
Source: Research Square preprint supplement (doi:10.21203/rs.3.rs-9167411/v1)
Supplement: Supplementary file 1 [file 0cb1db4a67f4568b505aeb2c.doc]

# **Supplementary Material: English Translation of the Survey Instrument**

**Description:** The following document contains the translated questions and corresponding answer categories used in this study to capture sociodemographic, lifestyle, and health-related data from the 'National Test for Poles’ Health' (NTZP) online questionnaire. Skip-logic and display filters are also indicated where applicable.

## **Part 1: Sociodemographic and Anthropometric Data**

**Q1. Please indicate your gender:**

- Female
- Male

**Q2. Please enter your age:** * [*Open text: 2-digit number*]

**Q3. What is your highest level of education achieved so far?**

- Primary
- Lower secondary
- Basic vocational
- Secondary
- Post-secondary
- Higher (bachelor/engineer)
- Higher (master)

**Q4. Please indicate the size of the town/city where you currently live:**

- Rural
- City up to 19,000 citizens
- City 20,000 – 49,000 citizens
- City 50,000 – 99,000 citizens
- City 100,000 – 199,000 citizens
- City 200,000 – 499,000 citizens
- City 500,000 or more citizens

**Q5. Please enter your height in centimeters:**

- [*Open text: 3-digit number*]

**Q6. Please enter your body mass (weight) in kilograms:**

- [*Open text: 3-digit number*]

**Q7. Please indicate your matrimonial status:**

- Single
- In a stable relationship (not married)
- Married
- Widowed
- Other

**Q8. What is your current professional status? Please choose your main source of income:**

- Employed under an employment contract or running your own business
- Employed under another contract (mandate contract, contract for specific work)
- Running a farm
- Pensioner
- Unemployed with the right to benefits
- Unemployed without the right to benefits
- Not working / studying

**Q9. Does your professional work have the character of:**

- Physically heavy work (you spend at least 50% of your time performing heavy physical work)
- Sedentary work (you spend more than half of your working time sitting or standing)
- Other (none of the above-mentioned)
- Not applicable

## **Part 2: Diagnosed Conditions and Neuroatypicality**

**Q10. Neurodiversity - are you neurotypical or neuroatypical?**

*(Methodological Note: Option 2 below was mapped to "Tourette's syndrome" in the current study based on the intended construct of the original survey administration, correcting a known typo in the raw Polish questionnaire dataset).*

- I am on the autism spectrum
- I have Tourette's syndrome
- I have ADHD
- I have dyslexia (including dysorthography, dyscalculia, or dysgraphia)
- I have Obsessive-Compulsive Disorder (OCD)
- I am characterized by another type of neuroatypicality
- I am neurotypical
- I don't know what neurotypical and/or neuroatypical means

**Q11. Have you ever been diagnosed with any of the following diseases/conditions?** *(Options: 1 - Yes, 2 - No)*

- Arterial hypertension
- Diabetes
- Heart diseases (ischemic heart disease, heart valve defect, heart failure, atrial fibrillation)
- Chronic obstructive pulmonary disease (COPD)
- Allergy or asthma
- Depression
- Cancer
- Arthritis
- Neurological disease
- COVID-19

## **Part 3: Self-Reported Mental Health and Symptom Frequency**

**Q12. How do you generally assess your physical health status compared to other people your age?** *(Note: This variable is referred to as "General health assessment" in the manuscript).*

- Very good
- Good
- Average (neither good nor bad)
- Bad
- Very bad

**Q13. What health ailments do you suffer from? How often do they bother you?** *(Options: 1 - At least a few times a month, 2 - Occasionally (less than a few times a month), 3 - Never)*

- Back / spine pain
- Headache *(Analyzed in the current study)*
- Heartburn / digestive issues
- Blurred vision
- Urinary incontinence
- Insomnia *(Analyzed in the current study)*
- Joint pain
- Chronic fatigue
- Allergies / runny nose
- Shortness of breath
- Constipation / diarrhea
- Memory disorders (forgetting names of loved ones, losing keys) *(Analyzed in the current study)*
- Mental, emotional, or physical job burnout *(Analyzed in the current study)*

## **Part 4: Lifestyle Factors**

**Q14. How often do you experience stressful situations?**

- Daily
- Several times a week
- Once a week
- Several times a month
- Once a month
- Less than once a month
- Never

**Q15. How often do you meet with friends/family?**

- Daily
- Several times a week
- Once a week
- Several times a month
- Once a month
- Less than once a month
- Never meet with friends/family

**Q16. How much time do you spend on average playing sports?**

- At least 2 hours per week or more
- Approximately 1-1.5 hours per week
- Less than 4 hours per month
- Don't do any sports

**Q17. What meals do you eat most often?**

- Balanced according to the food pyramid
- Vegetarian
- Vegan
- Meat
- Gluten-free
- Dairy-free
- With limited carbohydrates (no potatoes, rice, pasta, etc.)
- With reduced sodium (table salt) content
- Other type of meals
- Don't know/hard to say

**Q18. How often do you eat fast-food products (hamburgers, fries, hot dogs, etc.)?**

- Daily
- Several times a week
- Once a week
- Several times a month
- Once a month
- Less than once a month
- Never eat such products

**Q19. How often do you eat vegetables (excluding potatoes and concentrate juices)?**

- Daily
- Several times a week
- Once a week
- Several times a month
- Once a month
- Less than once a month
- Never eat vegetables

**Q20. How often do you eat fruit (excluding concentrate juices)?**

- Daily
- Several times a week
- Once a week
- Several times a month
- Once a month
- Less than once a month
- Never eat fruits

**Q21. [Screening Question] Do you smoke cigarettes or other tobacco products?** *(If the participant answered "No, never", Q22 was not displayed).*

**Q22. [Displayed if Q21 = Yes/Past] Do you smoke the following types of tobacco products?** *(Options: 1 - Yes, daily or almost daily, 2 - Yes, occasionally, 3 - No, but I have smoked in the past, 4 - No, never)*

- Conventional tobacco products
- Heated tobacco
- E-cigarette (liquids)

**Q23. [Screening Question] How much alcohol do you drink?**

- Two or more drinks a day
- About one drink a day
- Two or three drinks a week
- Two or three drinks a month
- One drink a month or less
- Never drink alcohol

**Q24. [Displayed if Q23 ≠ Option 6] Do you drink the following types of alcohol?** *(Options: 1 - Yes, every day, 2 - Yes, several times a week, 3 - Yes, several times a month, 4 - Yes, once a month or less often, 5 - No, never)*

- Beer
- Wine
- Vodka
- Other alcohols

**Table S1.** Logistic regression analysis of factors associated with general health assessment*.

| **Trait** | **Estimate** | **OR** | **Lower 95 CI OR** | **Upper 95 CI OR** | ***p*** |
| --- | --- | --- | --- | --- | --- |
| **General health assessment** | | | | | |
| Intercept 1 | -3.07 | - | - | - | - |
| Intercept 2 | -0.73 | - | - | - | - |
| Intercept 3 | 1.18 | - | - | - | - |
| Intercept 4 | 3.62 | - | - | - | - |
| **Gender** | | | | | |
| females | reference |  |  |  |  |
| males | 0.08 | 1.09 | 0.99 | 1.19 | 0.0694 |
| **Age [y]** | **0.03** | **1.03** | **1.03** | **1.04** | **<0.001** |
| Body height [cm] | -0.004 | 1.00 | 0.98 | 1.01 | 0.5759 |
| Body mass [kg] | 0.01 | 1.01 | 0.99 | 1.02 | 0.2849 |
| BMI [kg/m2] | -0.02 | 0.98 | 0.94 | 1.02 | 0.3688 |
| Place of residence |  |  |  |  |  |
| rural | 0.06 | 1.06 | 0.96 | 1.18 | 0.2305 |
| city up to 19000 citizens | 0.05 | 1.05 | 0.94 | 1.18 | 0.3615 |
| city 20-49000 citizens | 0.10 | 1.10 | 0.99 | 1.22 | 0.0716 |
| city 50-99000 citizens | reference |  |  |  |  |
| city 100-199000 citizens | 0.06 | 1.06 | 0.95 | 1.19 | 0.2973 |
| city 200-499000 citizens | 0.08 | 1.09 | 0.97 | 1.22 | 0.1604 |
| city 500000 or more citizens | -0.003 | 1.00 | 0.90 | 1.10 | 0.9269 |
| **Education level** | | | | | |
| primary | -0.15 | 0.86 | 0.72 | 1.04 | 0.1204 |
| **lower secondary** | **-0.34** | **0.71** | **0.54** | **0.94** | **0.0156** |
| basic vocational | 0.07 | 1.08 | 0.98 | 1.18 | 0.1285 |
| secondary | reference |  |  |  |  |
| post-secondary | 0.04 | 1.04 | 0.94 | 1.14 | 0.4664 |
| **higher (bachelor/engineer)** | **-0.12** | **0.89** | **0.80** | **0.98** | **0.0221** |
| higher (master) | 0.07 | 1.07 | 1.00 | 1.16 | 0.0615 |
| **Matrimonial status** | | | | | |
| **single** | **-0.41** | **0.66** | **0.60** | **0.72** | **<0.001** |
| in a stable relationship | reference |  |  |  |  |
| married | -0.05 | 0.95 | 0.88 | 1.02 | 0.1846 |
| **widowed** | **-0.24** | **0.79** | **0.70** | **0.89** | **<0.001** |
| **other** | **-0.36** | **0.69** | **0.58** | **0.83** | **<0.001** |
| **Professional status** | | | | | |
| **employed under an employment contract or running your own business** | **0.34** | **1.40** | **1.24** | **1.59** | **<0.001** |
| employed under another contract (mandate contract, contract for specific work) | 0.14 | 1.15 | 0.98 | 1.35 | 0.0956 |
| running a farm | -0.02 | 0.98 | 0.71 | 1.36 | 0.8983 |
| pensioner | reference |  |  |  |  |
| unemployed with the right to benefits | -0.08 | 0.93 | 0.72 | 1.19 | 0.5522 |
| unemployed without the right to benefits | 0.08 | 1.08 | 0.91 | 1.28 | 0.3851 |
| not working/studying | 0.10 | 1.11 | 0.90 | 1.36 | 0.3360 |
| **Work type** | | | | | |
| physically heavy (at least 50% of working time) | 0.001 | 1.00 | 0.91 | 1.10 | 0.9820 |
| sedentary (at least 50% of working time) | reference |  |  |  |  |
| other (none of above-mentioned) | 0.07 | 1.07 | 0.98 | 1.17 | 0.1094 |
| **n/a** | **-0.23** | **0.80** | **0.71** | **0.90** | **<0.001** |
| **Neuroatypicality** | | | | | |
| autism spectrum | -0.36 | 0.70 | 0.48 | 1.01 | 0.0556 |
| Tourettes syndrome | -0.14 | 0.87 | 0.27 | 2.79 | 0.8112 |
| **ADHD** | **-0.35** | **0.70** | **0.56** | **0.89** | **0.0034** |
| dyslexia (including dysorthography, dyscalculia or dysgraphia) | reference |  |  |  |  |
| **OCD** | **-0.96** | **0.38** | **0.29** | **0.49** | **<0.001** |
| **another type of neuroatypicality** | **-0.56** | **0.57** | **0.46** | **0.71** | **<0.001** |
| **I am neuroatypical** | **0.42** | **1.51** | **1.28** | **1.79** | **<0.001** |
| I don't know what neurotypical and/or neuroatypical means | 0.13 | 1.14 | 0.97 | 1.34 | 0.1010 |
| **Chronic diseases** | | | | | |
| **yes** | **-0.50** | **0.60** | **0.57** | **0.64** | **<0.001** |
| no | reference |  |  |  |  |
| **Hypertension** | | | | | |
| yes | -0.03 | 0.97 | 0.91 | 1.04 | 0.4186 |
| no | reference |  |  |  |  |
| **Diabetes** | | | | | |
| **yes** | **-0.14** | **0.87** | **0.79** | **0.95** | **0.0027** |
| no | reference |  |  |  |  |
| **Heart diseases** | | | | | |
| **yes** | **-0.13** | **0.88** | **0.81** | **0.95** | **0.002** |
| no | reference |  |  |  |  |
| **Chronic obstructive pulmonary disease (COPD)** | | | | | |
| yes | -0.12 | 0.89 | 0.79 | 1.00 | 0.0551 |
| no | reference |  |  |  |  |
| **Allergy or asthma** | | | | | |
| yes | -0.02 | 0.98 | 0.92 | 1.05 | 0.6418 |
| no | reference |  |  |  |  |
| **Cancer** | | | | | |
| yes | -0.10 | 0.91 | 0.81 | 1.01 | 0.0684 |
| no | reference |  |  |  |  |
| **Arthritis** | | | | | |
| **yes** | **-0.21** | **0.81** | **0.76** | **0.86** | **<0.001** |
| no | reference |  |  |  |  |
| **COVID-19** | | | | | |
| **yes** | **-0.19** | **0.83** | **0.78** | **0.88** | **<0.001** |
| no | reference |  |  |  |  |
| **Smoking (conventional tobacco products)** | | | | | |
| yes, daily or almost daily | 0.04 | 1.04 | 0.97 | 1.12 | 0.2921 |
| yes, occasionally | reference |  |  |  |  |
| no, but I have smoked in the past | -0.01 | 0.99 | 0.88 | 1.10 | 0.8170 |
| no, never | 0.09 | 1.09 | 0.95 | 1.25 | 0.2194 |
| **Smoking (heated tobacco)** | | | | | |
| yes, daily or almost daily | -0.03 | 0.97 | 0.84 | 1.12 | 0.6756 |
| yes, occasionally | reference |  |  |  |  |
| no, but I have smoked in the past | -0.02 | 0.98 | 0.84 | 1.16 | 0.8413 |
| no, never | 0.07 | 1.08 | 0.95 | 1.22 | 0.2438 |
| **Smoking (e-cigarettes, liquids)** | | | | | |
| yes, daily or almost daily | -0.10 | 0.90 | 0.79 | 1.04 | 0.1505 |
| yes, occasionally | reference |  |  |  |  |
| **no, but I have smoked in the past** | **-0.16** | **0.85** | **0.75** | **0.97** | **0.0165** |
| no, never | 0.002 | 1.00 | 0.90 | 1.12 | 0.9726 |
| **Alcohol drinking** | | | | | |
| two or more drinks a day | -0.09 | 0.91 | 0.78 | 1.06 | 0.2412 |
| about one drink a day | 0.02 | 1.02 | 0.89 | 1.16 | 0.7724 |
| two or three drinks a week | 0.04 | 1.04 | 0.95 | 1.13 | 0.3709 |
| two or three drinks a month | reference |  |  |  |  |
| one drink a month or less | 0.003 | 1.00 | 0.93 | 1.08 | 0.9382 |
| **Drinking (beer)** | | | | | |
| yes, every day | 0.01 | 1.01 | 0.87 | 1.16 | 0.9053 |
| yes, several times a week | -0.04 | 0.96 | 0.86 | 1.07 | 0.4470 |
| yes, several times a month | reference |  |  |  |  |
| yes, once a month or less often | 0.05 | 1.05 | 0.97 | 1.13 | 0.2525 |
| no, never | 0.05 | 1.05 | 0.96 | 1.15 | 0.2789 |
| **Drinking (wine)** | | | | | |
| yes, every day | 0.11 | 1.11 | 0.87 | 1.42 | 0.3894 |
| yes, several times a week | -0.10 | 0.91 | 0.78 | 1.06 | 0.2213 |
| yes, several times a month | reference |  |  |  |  |
| yes, once a month or less often | 0.02 | 1.02 | 0.93 | 1.11 | 0.7103 |
| **no, never** | **0.10** | **1.11** | **1.01** | **1.22** | **0.0349** |
| **Drinking (vodka)** | | | | | |
| yes, every day | -0.12 | 0.89 | 0.69 | 1.14 | 0.3626 |
| **yes, several times a week** | **-0.19** | **0.83** | **0.70** | **0.98** | **0.0295** |
| yes, several times a month | reference |  |  |  |  |
| yes, once a month or less often | 0.03 | 1.03 | 0.94 | 1.13 | 0.5087 |
| no, never | 0.08 | 1.08 | 0.98 | 1.19 | 0.1314 |
| **Drinking (other alcohols)** | | | | | |
| yes, every day | -0.15 | 0.86 | 0.63 | 1.18 | 0.3594 |
| yes, several times a week | -0.05 | 0.95 | 0.77 | 1.17 | 0.6270 |
| yes, several times a month | reference |  |  |  |  |
| yes, once a month or less often | -0.05 | 0.95 | 0.85 | 1.06 | 0.3381 |
| no, never | -0.01 | 0.99 | 0.89 | 1.10 | 0.8177 |
| **Most frequently consumed meals** | | | | | |
| balanced according to the food pyramid | 0.10 | 1.11 | 0.80 | 1.53 | 0.5277 |
| vegetarian | -0.24 | 0.79 | 0.56 | 1.11 | 0.1671 |
| vegan | -0.16 | 0.85 | 0.48 | 1.50 | 0.5742 |
| meat | 0.07 | 1.07 | 0.78 | 1.48 | 0.6700 |
| gluten-free | reference |  |  |  |  |
| dairy-free | 0.22 | 1.25 | 0.80 | 1.96 | 0.3276 |
| with limited carbohydrates (no potatoes, rice, pasta, etc,) | 0.13 | 1.14 | 0.82 | 1.59 | 0.4282 |
| with reduced sodium (table salt) content | -0.00002 | 1.00 | 0.72 | 1.40 | 0.9999 |
| other type of meals - what type? | 0.11 | 1.12 | 0.79 | 1.59 | 0.5385 |
| don't know/hard to say | -0.21 | 0.81 | 0.59 | 1.11 | 0.1918 |
| **Eating fast food** | | | | | |
| daily | -0.18 | 0.84 | 0.45 | 1.56 | 0.5735 |
| several times a week | -0.29 | 0.75 | 0.61 | 0.92 | 0.0049 |
| once a week | -0.10 | 0.90 | 0.78 | 1.05 | 0.1792 |
| several times a month | reference |  |  |  |  |
| once a month | -0.0004 | 1.00 | 0.91 | 1.10 | 0.9931 |
| less than once a month | 0.11 | 1.12 | 1.02 | 1.22 | 0.0126 |
| **never eat such products** | **0.16** | **1.17** | **1.05** | **1.31** | **0.006** |
| **Eating vegetables** | | | | | |
| **daily** | **0.21** | **1.24** | **1.11** | **1.38** | **<0.001** |
| several times a week | 0.05 | 1.05 | 0.95 | 1.16 | 0.3336 |
| once a week | 0.01 | 1.01 | 0.89 | 1.15 | 0.8686 |
| several times a month | reference |  |  |  |  |
| once a month | -0.09 | 0.91 | 0.73 | 1.14 | 0.4230 |
| less than once a month | 0.05 | 1.05 | 0.86 | 1.28 | 0.6401 |
| never eat vegetables | 0.25 | 1.28 | 0.82 | 2.02 | 0.2781 |
| **Eating fruits** | | | | | |
| **daily** | **0.22** | **1.25** | **1.13** | **1.38** | **<0.001** |
| **several times a week** | **0.14** | **1.15** | **1.05** | **1.27** | **0.0022** |
| once a week | 0.07 | 1.07 | 0.95 | 1.20 | 0.2543 |
| several times a month | reference |  |  |  |  |
| once a month | -0.08 | 0.93 | 0.78 | 1.11 | 0.4052 |
| less than once a month | -0.001 | 1.00 | 0.85 | 1.17 | 0.9866 |
| never eat fruits | -0.04 | 0.96 | 0.70 | 1.32 | 0.7974 |
| **Sporting activity** |  |  |  |  |  |
| **at least 2 hours per week or more** | **0.27** | **1.31** | **1.18** | **1.45** | **<0.001** |
| approximately 1-1,5 hours per week | 0.02 | 1.02 | 0.91 | 1.14 | 0.7016 |
| less than 4 hours per month | reference |  |  |  |  |
| don't do any sports | -0.06 | 0.94 | 0.86 | 1.03 | 0.1808 |
| **Stress level** |  |  |  |  |  |
| **daily** | **-1.27** | **0.28** | **0.26** | **0.31** | **<0.001** |
| **several times a week** | **-0.71** | **0.49** | **0.45** | **0.53** | **<0.001** |
| **once a week** | **-0.23** | **0.79** | **0.69** | **0.91** | **<0.001** |
| several times a month | reference |  |  |  |  |
| **once a month** | **0.35** | **1.42** | **1.23** | **1.63** | **<0.001** |
| **less than once a month** | **0.74** | **2.09** | **1.90** | **2.30** | **<0.001** |
| **never** | **1.30** | **3.67** | **2.92** | **4.60** | **<0.001** |
| **Social relationships** |  |  |  |  |  |
| **daily** | **0.52** | **1.69** | **1.54** | **1.85** | **<0.001** |
| **several times a week** | **0.29** | **1.33** | **1.23** | **1.44** | **<0.001** |
| once a week | -0.002 | 1.00 | 0.91 | 1.10 | 0.9670 |
| several times a month | reference |  |  |  |  |
| **once a month** | **-0.20** | **0.82** | **0.73** | **0.92** | **<0.001** |
| **less than once a month** | **-0.35** | **0.70** | **0.65** | **0.77** | **<0.001** |
| **never meet with friends/family** | **-0.63** | **0.53** | **0.43** | **0.66** | **<0.001** |

*Results of the multivariable ordinal logistic regression analysis identifying correlates of general health assessment. OR: Odds Ratio; CI: Confidence Interval; p: p-value. **Bold text** indicates statistically significant predictors (p < 0.05). Reference categories for categorical independent variables are indicated as 'reference'.

**Table S2.** Logistic regression analysis of factors associated with frequent headache*.

| **Trait** | **Estimate** | **OR** | **Lower 95 CI OR** | **Upper 95 CI OR** | ***p*** |
| --- | --- | --- | --- | --- | --- |
| **Headache** | | | | | |
| Intercept 1 | 4.47 | - | - | - | - |
| Intercept 2 | 7.49 | - | - | - | - |
| **Gender** | | | | | |
| females | reference |  |  |  |  |
| **males** | **-0.84** | **0.43** | **0.39** | **0.48** | **<0.001** |
| **Age [y]** | **-0.03** | **0.97** | **0.97** | **0.98** | **<0.001** |
| **Body height [cm]** | **-0.02** | **0.98** | **0.96** | **1.00** | **0.0106** |
| **Body mass [kg]** | 0.01 | 1.01 | 1.00 | 1.03 | 0.1723 |
| **BMI [kg/m2]** | -0.05 | 0.95 | 0.91 | 1.00 | 0.0503 |
| **Place of residence** | | | | | |
| rural | 0.04 | 1.04 | 0.93 | 1.15 | 0.5057 |
| city up to 19000 citizens | -0.002 | 1.00 | 0.89 | 1.12 | 0.9714 |
| city 20-49000 citizens | reference |  |  |  |  |
| city 50-99000 citizens | -0.06 | 0.95 | 0.85 | 1.06 | 0.3232 |
| city 100-199000 citizens | -0.09 | 0.92 | 0.81 | 1.03 | 0.1588 |
| city 200-499000 citizens | 0.02 | 1.02 | 0.90 | 1.15 | 0.7477 |
| city 500000 or more citizens | -0.04 | 0.96 | 0.86 | 1.08 | 0.5222 |
| **Education level** | | | | | |
| **primary** | **0.37** | **1.45** | **1.19** | **1.78** | **0.0013** |
| lower secondary | -0.12 | 0.89 | 0.66 | 1.19 | 0.4190 |
| basic vocational | reference |  |  |  |  |
| **secondary** | **0.14** | **1.15** | **1.04** | **1.27** | **0.0054** |
| post-secondary | -0.09 | 0.91 | 0.83 | 1.01 | 0.0803 |
| **higher (bachelor/engineer)** | **-0.17** | **0.84** | **0.75** | **0.94** | **0.0024** |
| **higher (master)** | **-0.16** | **0.85** | **0.78** | **0.92** | **0.0011** |
| **Matrimonial status** | | | | | |
| **single** | **-0.10** | **0.91** | **0.82** | **1.00** | **0.0412** |
| in a stable relationship | reference |  |  |  |  |
| married | 0.06 | 1.07 | 0.98 | 1.16 | 0.1170 |
| widowed | -0.06 | 0.94 | 0.83 | 1.07 | 0.3665 |
| other | -0.05 | 0.95 | 0.78 | 1.16 | 0.6100 |
| **Profesisonal status** | | | | | |
| employed under an employment contract or running your own business | 0.13 | 1.14 | 0.99 | 1.30 | 0.0603 |
| employed under another contract (mandate contract, contract for specific work) | 0.09 | 1.10 | 0.92 | 1.30 | 0.2935 |
| running a farm | 0.08 | 1.09 | 0.77 | 1.54 | 0.6382 |
| pensioner | reference |  |  |  |  |
| unemployed with the right to benefits | -0.004 | 1.00 | 0.76 | 1.30 | 0.9749 |
| **unemployed without the right to benefits** | **0.24** | **1.27** | **1.06** | **1.53** | **0.009** |
| not working/studying | 0.12 | 1.13 | 0.90 | 1.41 | 0.2839 |
| **Work type** | | | | | |
| physically heavy (at least 50% of working time) | 0.06 | 1.06 | 0.96 | 1.18 | 0.2118 |
| sedentary (at least 50% of working time) | reference |  |  |  |  |
| **other (none of above-mentioned)** | **-0.10** | **0.91** | **0.83** | **0.99** | **0.0374** |
| n/a | 0.09 | 1.09 | 0.96 | 1.24 | 0.1676 |
| **Neuroatypicality** | | | | | |
| autism spectrum | -0.10 | 0.91 | 0.61 | 1.35 | 0.6288 |
| Tourettes syndrome | 1.02 | 2.76 | 0.77 | 9.94 | 0.1202 |
| ADHD | reference |  |  |  |  |
| dyslexia (including dysorthography, dyscalculia or dysgraphia) | -0.07 | 0.94 | 0.73 | 1.20 | 0.6002 |
| OCD | 0.07 | 1.07 | 0.81 | 1.42 | 0.6224 |
| another type of neuroatypicality | 0.07 | 1.08 | 0.85 | 1.36 | 0.5304 |
| **I am neuroatypical** | **-0.19** | **0.83** | **0.69** | **0.99** | **0.0365** |
| I don't know what neurotypical and/or neuroatypical means | -0.07 | 0.93 | 0.78 | 1.10 | 0.4086 |
| **Chronic diseases** | | | | | |
| **yes** | **0.31** | **1.36** | **1.28** | **1.46** | **<0.001** |
| no | reference |  |  |  |  |
| **Hypertension** | | | | | |
| **yes** | **0.09** | **1.10** | **1.03** | **1.18** | **0.0077** |
| no | reference |  |  |  |  |
| **Diabetes** | | | | | |
| **yes** | **-0.11** | **0.89** | **0.81** | **0.99** | **0.0281** |
| no | reference |  |  |  |  |
| **Heart diseases** | | | | | |
| **yes** | **0.23** | **1.26** | **1.16** | **1.38** | **<0.001** |
| no | reference |  |  |  |  |
| **Chronic obstructive pulmonary disease (COPD)** | | | | | |
| yes | 0.04 | 1.04 | 0.91 | 1.18 | 0.5779 |
| no | reference |  |  |  |  |
| **Allergy or asthma** |  |  |  |  |  |
| **yes** | **0.22** | **1.25** | **1.17** | **1.34** | **<0.001** |
| no | reference |  |  |  |  |
| **Cancer** |  |  |  |  |  |
| **yes** | **0.19** | **1.21** | **1.08** | **1.36** | **0.0019** |
| no | reference |  |  |  |  |
| **Arthritis** |  |  |  |  |  |
| **yes** | **0.26** | **1.30** | **1.21** | **1.39** | **<0.001** |
| no | reference |  |  |  |  |
| **COVID-19** |  |  |  |  |  |
| **yes** | **0.11** | **1.12** | **1.05** | **1.19** | **0.0014** |
| no | reference |  |  |  |  |
| **Smoking (conventional tobacco products)** | | | | | |
| yes, daily or almost daily | 0.004 | 1.00 | 0.93 | 1.08 | 0.9117 |
| yes, occasionally | reference |  |  |  |  |
| no, but i have smoked in the past | -0.08 | 0.92 | 0.82 | 1.04 | 0.1748 |
| no, never | -0.09 | 0.91 | 0.79 | 1.06 | 0.2281 |
| **Smoking (heated tobacco)** | | | | | |
| **yes, daily or almost daily** | **-0.16** | **0.85** | **0.73** | **1.00** | **0.0473** |
| yes, occasionally | reference |  |  |  |  |
| no, but I have smoked in the past | -0.07 | 0.93 | 0.79 | 1.11 | 0.4348 |
| **no, never** | **-0.14** | **0.87** | **0.76** | **0.99** | **0.0376** |
| **Smoking (e-cigarette, liquids)** | | | | | |
| yes, daily or almost daily | 0.01 | 1.01 | 0.87 | 1.17 | 0.9091 |
| yes, occasionally | reference |  |  |  |  |
| no, but i have smoked in the past | -0.09 | 0.91 | 0.79 | 1.05 | 0.1887 |
| no, never | -0.10 | 0.91 | 0.81 | 1.02 | 0.1044 |
| **Alcohol drinking** | | | | | |
| **two or more drinks a day** | **-0.39** | **0.67** | **0.57** | **0.80** | **<0.001** |
| **about one drink a day** | **-0.21** | **0.81** | **0.70** | **0.93** | **0.0030** |
| **two or three drinks a week** | **-0.17** | **0.84** | **0.77** | **0.92** | **0.0012** |
| two or three drinks a month | reference |  |  |  |  |
| one drink a month or less | 0.06 | 1.07 | 0.98 | 1.15 | 0.1231 |
| **Drinking (beer)** | | | | | |
| **yes, every day** | **-0.17** | **0.84** | **0.72** | **0.98** | **0.0267** |
| yes, several times a week | -0.05 | 0.95 | 0.85 | 1.07 | 0.4103 |
| yes, several times a month | reference |  |  |  |  |
| yes, once a month or less often | 0.03 | 1.03 | 0.94 | 1.12 | 0.5604 |
| no, never | -0.01 | 0.99 | 0.90 | 1.09 | 0.8857 |
| **Drinking (wine)** | | | | | |
| yes, every day | 0.17 | 1.19 | 0.91 | 1.54 | 0.2007 |
| yes, several times a week | 0.08 | 1.08 | 0.92 | 1.28 | 0.3398 |
| yes, several times a month | reference |  |  |  |  |
| yes, once a month or less often | 0.05 | 1.05 | 0.95 | 1.15 | 0.3398 |
| no, never | -0.03 | 0.97 | 0.88 | 1.07 | 0.5543 |
| **Drinking (vodka)** | | | | | |
| yes, every day | 0.12 | 1.13 | 0.86 | 1.48 | 0.3666 |
| yes, several times a week | -0.003 | 1.00 | 0.83 | 1.20 | 0.9711 |
| yes, several times a month | reference |  |  |  |  |
| yes, once a month or less often | -0.03 | 0.97 | 0.88 | 1.07 | 0.5141 |
| no, never | -0.10 | 0.90 | 0.81 | 1.00 | 0.0616 |
| **Drinking (other alcohols)** | | | | | |
| yes, every day | -0.10 | 0.90 | 0.64 | 1.27 | 0.5461 |
| yes, several times a week | -0.10 | 0.90 | 0.73 | 1.13 | 0.3661 |
| yes, several times a month | reference |  |  |  |  |
| yes, once a month or less often | -0.0012 | 1.00 | 0.89 | 1.12 | 0.9968 |
| no, never | -0.07 | 0.93 | 0.83 | 1.04 | 0.1993 |
| **Most frequently consumed meals** | | | | | |
| **balanced according to the food pyramid** | **-0.35** | **0.70** | **0.50** | **0.99** | **0.0428** |
| vegetarian | -0.33 | 0.72 | 0.50 | 1.04 | 0.0769 |
| **vegan** | **-0.62** | **0.54** | **0.29** | **0.99** | **0.0462** |
| meat | -0.29 | 0.75 | 0.53 | 1.05 | 0.0986 |
| gluten-free | reference |  |  |  |  |
| dairy-free | -0.30 | 0.74 | 0.46 | 1.19 | 0.2176 |
| **with limited carbohydrates (no potatoes, rice, pasta, etc,)** | **-0.49** | **0.61** | **0.43** | **0.87** | **0.0067** |
| with reduced sodium (table salt) content | -0.22 | 0.80 | 0.56 | 1.14 | 0.2158 |
| other type of meals - what type? | -0.34 | 0.71 | 0.49 | 1.03 | 0.0739 |
| don't know/hard to say | -0.17 | 0.84 | 0.60 | 1.18 | 0.3271 |
| **Eating fast food** | | | | | |
| **daily** | **0.94** | **2.55** | **1.27** | **5.15** | **0.0088** |
| several times a week | 0.07 | 1.07 | 0.86 | 1.33 | 0.5326 |
| **once a week** | **-0.26** | **0.77** | **0.66** | **0.90** | **0.0013** |
| several times a month | reference |  |  |  |  |
| **once a month** | **-0.15** | **0.86** | **0.78** | **0.96** | **0.0068** |
| **less than once a month** | **-0.21** | **0.81** | **0.74** | **0.89** | **<0.001** |
| **never eat such products** | **-0.47** | **0.62** | **0.55** | **0.70** | **<0.001** |
| **Eating vegetables** | | | | | |
| daily | -0.09 | 0.91 | 0.81 | 1.02 | 0.1073 |
| several times a week | -0.08 | 0.93 | 0.83 | 1.03 | 0.1415 |
| once a week | -0.05 | 0.95 | 0.82 | 1.09 | 0.4402 |
| several times a month | reference |  |  |  |  |
| once a month | 0.06 | 1.06 | 0.84 | 1.35 | 0.6185 |
| less than once a month | 0.01 | 1.01 | 0.82 | 1.25 | 0.9258 |
| never eat vegetables | -0.05 | 0.96 | 0.59 | 1.56 | 0.8540 |
| **Eating fruits** | | | | | |
| **daily** | **-0.15** | **0.86** | **0.77** | **0.96** | **0.0058** |
| several times a week | -0.03 | 0.97 | 0.88 | 1.07 | 0.5490 |
| once a week | -0.11 | 0.89 | 0.79 | 1.01 | 0.0769 |
| several times a month | reference |  |  |  |  |
| once a month | -0.16 | 0.85 | 0.70 | 1.03 | 0.0932 |
| less than once a month | -0.15 | 0.86 | 0.73 | 1.02 | 0.0889 |
| never eat fruits | -0.05 | 0.95 | 0.68 | 1.33 | 0.7618 |
| **Sporting activity** | | | | | |
| **at least 2 hours per week or more** | **-0.28** | **0.75** | **0.68** | **0.84** | **<0.001** |
| approximately 1-1,5 hours per week | -0.06 | 0.94 | 0.83 | 1.06 | 0.2951 |
| less than 4 hours per month | reference |  |  |  |  |
| don't do any sports | 0.04 | 1.04 | 0.94 | 1.15 | 0.4241 |
| **Stress level** | | | | | |
| **daily** | **0.62** | **1.85** | **1.69** | **2.03** | **<0.001** |
| **several times a week** | **0.33** | **1.39** | **1.28** | **1.52** | **<0.001** |
| once a week | -0.12 | 0.89 | 0.77 | 1.02 | 0.1043 |
| several times a month | reference |  |  |  |  |
| **once a month** | **-0.22** | **0.81** | **0.70** | **0.93** | **0.0038** |
| **less than once a month** | **-0.43** | **0.65** | **0.59** | **0.72** | **<0.001** |
| **never** | **-0.77** | **0.46** | **0.37** | **0.59** | **<0.001** |
| **Social relationships** | | | | | |
| **daily** | **-0.18** | **0.83** | **0.75** | **0.92** | **0.0012** |
| **several times a week** | **-0.11** | **0.90** | **0.82** | **0.98** | **0.0113** |
| once a week | -0.04 | 0.96 | 0.87 | 1.06 | 0.3802 |
| several times a month | reference |  |  |  |  |
| once a month | 0.03 | 1.03 | 0.91 | 1.16 | 0.6144 |
| less than once a month | 0.08 | 1.08 | 0.98 | 1.19 | 0.1104 |
| never meet with friends/family | -0.02 | 0.98 | 0.78 | 1.23 | 0.8460 |

*Results of the multivariable ordinal logistic regression analysis identifying correlates of headache frequency . OR: Odds Ratio; CI: Confidence Interval; p: p-value. **Bold text** indicates statistically significant predictors (p < 0.05). Reference categories for categorical independent variables are indicated as 'reference'.

**Table S3.** Logistic regression analysis of factors associated with memory disorders*.

| **Trait** | **Estimate** | **OR** | **Lower 95 CI OR** | **Upper 95 CI OR** | ***p*** |
| --- | --- | --- | --- | --- | --- |
| Memory disorders | | | | | |
| Intercept 1 | -2.44 | - | - | - | - |
| Intercept 2 | -0.45 | - | - | - | - |
| **Gender** | | | | | |
| females | reference |  |  |  |  |
| **males** | **-0.33** | **0.72** | **0.65** | **0.79** | **<0.001** |
| **Age [y]** | **0.01** | **1.01** | **1.01** | **1.02** | **<0.001** |
| Body height [cm] | 0.01 | 1.01 | 0.99 | 1.02 | 0.4611 |
| **Body mass [kg]** | **-0.02** | **0.98** | **0.96** | **1.00** | **0.0196** |
| BMI [kg/m2] | 0.05 | 1.05 | 1.00 | 1.10 | 0.0571 |
| **Place of residence** | | | | | |
| **rural** | **0.13** | **1.14** | **1.03** | **1.27** | **0.0140** |
| **city up to 19000 citizens** | **0.14** | **1.15** | **1.02** | **1.29** | **0.0222** |
| city 20-49000 citizens | 0.01 | 1.01 | 0.90 | 1.12 | 0.9246 |
| city 50-99000 citizens | reference |  |  |  |  |
| city 100-199000 citizens | -0.04 | 0.96 | 0.85 | 1.08 | 0.5024 |
| **city 200-499000 citizens** | **-0.18** | **0.84** | **0.74** | **0.94** | **0.0042** |
| **city 500000 or more citizens** | **-0.14** | **0.87** | **0.77** | **0.97** | **0.0133** |
| **Education level** | | | | | |
| primary | -0.08 | 0.92 | 0.76 | 1.12 | 0.4077 |
| **lower secondary** | **0.36** | **1.43** | **1.08** | **1.90** | **0.0127** |
| basic vocational | 0.08 | 1.08 | 0.98 | 1.19 | 0.1375 |
| secondary | reference |  |  |  |  |
| post-secondary | -0.03 | 0.97 | 0.88 | 1.08 | 0.5897 |
| higher (bachelor/engineer) | -0.09 | 0.92 | 0.82 | 1.03 | 0.1374 |
| **higher (master)** | **-0.12** | **0.89** | **0.82** | **0.96** | **0.0038** |
| **Matrimonial status** | | | | | |
| **single** | **0.10** | **1.11** | **1.01** | **1.22** | **0.0347** |
| in a stable relationship | reference |  |  |  |  |
| married | -0.01 | 0.99 | 0.91 | 1.08 | 0.8514 |
| widowed | -0.07 | 0.93 | 0.82 | 1.06 | 0.2992 |
| other | 0.04 | 1.04 | 0.86 | 1.26 | 0.6849 |
| **Profesisonal status** | | | | | |
| **employed under an employment contract or running your own business** | **-0.28** | **0.75** | **0.66** | **0.86** | **<0.001** |
| **employed under another contract (mandate contract, contract for specific work)** | **-0.26** | **0.77** | **0.65** | **0.92** | **0.0032** |
| running a farm | -0.06 | 0.94 | 0.67 | 1.33 | 0.7331 |
| pensioner | reference |  |  |  |  |
| unemployed with the right to benefits | 0.13 | 1.14 | 0.88 | 1.48 | 0.3110 |
| unemployed without the right to benefits | -0.01 | 0.99 | 0.83 | 1.18 | 0.8877 |
| not working/studying | -0.01 | 0.99 | 0.79 | 1.23 | 0.9137 |
| **Work type** | | | | | |
| **physically heavy (at least 50% of working time)** | **0.11** | **1.12** | **1.01** | **1.23** | **0.0311** |
| sedentary (at least 50% of working time) | reference |  |  |  |  |
| other (none of above-mentioned) | 0.01 | 1.01 | 0.92 | 1.11 | 0.7586 |
| n/a | 0.01 | 1.01 | 0.89 | 1.14 | 0.9077 |
| **Neuroatypicality** | | | | | |
| autism spectrum | -0.07 | 0.93 | 0.63 | 1.37 | 0.7173 |
| Tourettes syndrome | -0.57 | 0.57 | 0.16 | 1.99 | 0.3748 |
| **ADHD** | **0.55** | **1.73** | **1.36** | **2.21** | **<0.001** |
| dyslexia (including dysorthography, dyscalculia or dysgraphia) | reference |  |  |  |  |
| OCD | 0.10 | 1.11 | 0.85 | 1.45 | 0.4490 |
| another type of neuroatypicality | 0.06 | 1.06 | 0.85 | 1.33 | 0.5966 |
| **I am neuroatypical** | **-0.39** | **0.68** | **0.57** | **0.81** | **<0.001** |
| **I don't know what neurotypical and/or neuroatypical means** | **-0.20** | **0.82** | **0.69** | **0.97** | **0.0197** |
| **Chronic diseases** | | | | | |
| **yes** | **0.33** | **1.38** | **1.29** | **1.48** | **<0.001** |
| no | reference |  |  |  |  |
| **Hypertension** | | | | | |
| yes | 0.02 | 1.02 | 0.96 | 1.10 | 0.5113 |
| no | reference |  |  |  |  |
| **Diabetes** | | | | | |
| **yes** | **0.19** | **1.21** | **1.10** | **1.33** | **0.0012** |
| **no** | **reference** |  |  |  |  |
| **Heart diseases** | | | | | |
| **yes** | **0.27** | **1.31** | **1.20** | **1.42** | **<0.001** |
| no | reference |  |  |  |  |
| **Chronic obstructive pulmonary disease (COPD)** | | | | | |
| yes | 0.06 | 1.06 | 0.94 | 1.21 | 0.3309 |
| no | reference |  |  |  |  |
| **Allergy or asthma** | | | | | |
| **yes** | **0.08** | **1.09** | **1.01** | **1.17** | **0.0173** |
| no | reference |  |  |  |  |
| **Cancer** | | | | | |
| **yes** | **0.28** | **1.32** | **1.18** | **1.47** | **<0.001** |
| no | reference |  |  |  |  |
| **Arthritis** | | | | | |
| **yes** | **0.29** | **1.33** | **1.24** | **1.43** | **<0.001** |
| no | reference |  |  |  |  |
| **COVID-19** | | | | | |
| **yes** | **0.22** | **1.25** | **1.17** | **1.33** | **<0.001** |
| no | reference |  |  |  |  |
| **Smoking (conventional tobacco products)** | | | | | |
| **yes, daily or almost daily** | **-0.18** | **0.84** | **0.77** | **0.90** | **<0.001** |
| yes, occasionally | reference |  |  |  |  |
| **no, but i have smoked in the past** | **-0.18** | **0.83** | **0.74** | **0.94** | **0.0026** |
| **no, never** | **-0.20** | **0.82** | **0.71** | **0.96** | **0.0107** |
| **Smoking (heated tobacco)** | | | | | |
| **yes, daily or almost daily** | **-0.23** | **0.79** | **0.68** | **0.93** | **0.0037** |
| yes, occasionally | reference |  |  |  |  |
| no, but i have smoked in the past | -0.03 | 0.97 | 0.82 | 1.15 | 0.7547 |
| **no, never** | **-0.25** | **0.78** | **0.68** | **0.88** | **<0.0011** |
| **Smoking (e-cigarette, liquids)** | | | | | |
| yes, daily or almost daily | 0.09 | 1.09 | 0.94 | 1.27 | 0.2384 |
| yes, occasionally | reference |  |  |  |  |
| no, but i have smoked in the past | -0.0015 | 1.00 | 0.87 | 1.15 | 0.9948 |
| no, never | -0.11 | 0.89 | 0.80 | 1.00 | 0.0577 |
| **Alcohol drinking** | | | | | |
| two or more drinks a day | 0.01 | 1.01 | 0.85 | 1.19 | 0.9415 |
| about one drink a day | -0.05 | 0.95 | 0.83 | 1.10 | 0.5196 |
| **two or three drinks a week** | **-0.10** | **0.91** | **0.83** | **0.99** | **0.0380** |
| two or three drinks a month | reference |  |  |  |  |
| one drink a month or less | -0.07 | 0.93 | 0.86 | 1.01 | 0.0899 |
| **Drinking (beer)** | | | | | |
| yes, every day | 0.05 | 1.06 | 0.90 | 1.23 | 0.4884 |
| **yes, several times a week** | **0.17** | **1.18** | **1.05** | **1.34** | **0.0054** |
| yes, several times a month | reference |  |  |  |  |
| yes, once a month or less often | 0.02 | 1.03 | 0.94 | 1.12 | 0.5682 |
| **no, never** | **-0.13** | **0.88** | **0.79** | **0.96** | **0.0071** |
| **Drinking (wine)** | | | | | |
| yes, every day | -0.20 | 0.82 | 0.62 | 1.07 | 0.1362 |
| yes, several times a week | -0.002 | 1.00 | 0.85 | 1.18 | 0.9846 |
| yes, several times a month | reference |  |  |  |  |
| **yes, once a month or less often** | **-0.12** | **0.88** | **0.80** | **0.97** | **0.0108** |
| **no, never** | **-0.16** | **0.85** | **0.77** | **0.94** | **<0.0016** |
| **Drinking (vodka)** | | | | | |
| yes, every day | 0.12 | 1.13 | 0.87 | 1.48 | 0.3614 |
| yes, several times a week | 0.02 | 1.02 | 0.85 | 1.22 | 0.8450 |
| yes, several times a month | reference |  |  |  |  |
| yes, once a month or less often | -0.06 | 0.95 | 0.86 | 1.05 | 0.2813 |
| **no, never** | **-0.22** | **0.80** | **0.72** | **0.89** | **<0.001** |
| **Drinking (other alcohols)** | | | | | |
| yes, every day | -0.10 | 0.91 | 0.65 | 1.28 | 0.5826 |
| yes, several times a week | 0.02 | 1.02 | 0.82 | 1.27 | 0.8635 |
| yes, several times a month | reference |  |  |  |  |
| yes, once a month or less often | 0.01 | 1.01 | 0.90 | 1.14 | 0.8620 |
| **no, never** | **-0.16** | **0.85** | **0.76** | **0.96** | **0.0066** |
| **Most frequently consumed meals** | | | | | |
| balanced according to the food pyramid | -0.21 | 0.81 | 0.58 | 1.13 | 0.2148 |
| vegetarian | 0.02 | 1.03 | 0.72 | 1.47 | 0.8924 |
| vegan | -0.37 | 0.69 | 0.37 | 1.30 | 0.2536 |
| meat | -0.15 | 0.86 | 0.62 | 1.21 | 0.3895 |
| gluten-free | reference |  |  |  |  |
| **dairy-free** | **-0.64** | **0.53** | **0.32** | **0.86** | **0.0109** |
| with limited carbohydrates (no potatoes, rice, pasta, etc,) | -0.13 | 0.88 | 0.62 | 1.24 | 0.4601 |
| with reduced sodium (table salt) content | -0.20 | 0.82 | 0.58 | 1.17 | 0.2710 |
| other type of meals - what type? | -0.06 | 0.94 | 0.65 | 1.36 | 0.7423 |
| don't know/hard to say | -0.04 | 0.96 | 0.69 | 1.34 | 0.8187 |
| **Eating fast food** | | | | | |
| daily | 0.10 | 1.10 | 0.58 | 2.10 | 0.7620 |
| **several times a week** | **0.35** | **1.42** | **1.15** | **1.75** | **<0.001** |
| once a week | 0.09 | 1.09 | 0.93 | 1.28 | 0.2616 |
| several times a month | reference |  |  |  |  |
| once a month | -0.01 | 0.99 | 0.89 | 1.10 | 0.8593 |
| **less than once a month** | **-0.14** | **0.87** | **0.79** | **0.95** | **0.003** |
| **never eat such products** | **-0.23** | **0.79** | **0.70** | **0.89** | **0.0012** |
| **Eating vegetables** | | | | | |
| **daily** | **-0.19** | **0.83** | **0.74** | **0.93** | **0.0012** |
| **several times a week** | **-0.11** | **0.90** | **0.81** | **0.99** | **0.0366** |
| once a week | -0.02 | 0.98 | 0.86 | 1.12 | 0.7730 |
| several times a month | reference |  |  |  |  |
| **once a month** | **0.28** | **1.33** | **1.05** | **1.67** | **0.0161** |
| less than once a month | 0.01 | 1.01 | 0.82 | 1.24 | 0.9128 |
| never eat vegetables | 0.04 | 1.04 | 0.65 | 1.66 | 0.8713 |
| **Eating fruits** | | | | | |
| daily | -0.09 | 0.91 | 0.82 | 1.02 | 0.0929 |
| several times a week | -0.01 | 0.99 | 0.90 | 1.10 | 0.9170 |
| once a week | 0.002 | 1.00 | 0.89 | 1.13 | 0.9743 |
| several times a month | reference |  |  |  |  |
| once a month | -0.03 | 0.97 | 0.80 | 1.17 | 0.7375 |
| less than once a month | -0.15 | 0.86 | 0.72 | 1.02 | 0.0789 |
| never eat vegetables | 0.02 | 1.02 | 0.73 | 1.42 | 0.9187 |
| **Sporting activity** | | | | | |
| **at least 2 hours per week or more** | **-0.15** | **0.86** | **0.77** | **0.96** | **0.0085** |
| approximately 1-1,5 hours per week | -0.07 | 0.93 | 0.82 | 1.05 | 0.2285 |
| less than 4 hours per month | reference |  |  |  |  |
| don't do any sports | -0.02 | 0.98 | 0.89 | 1.08 | 0.7450 |
| **Stress level** |  |  |  |  |  |
| **daily** | **0.73** | **2.07** | **1.88** | **2.26** | **<0.001** |
| **several times a week** | **0.30** | **1.35** | **1.24** | **1.47** | **<0.001** |
| once a week | 0.08 | 1.09 | 0.94 | 1.26 | 0.2597 |
| several times a month | reference |  |  |  |  |
| **once a month** | **-0.17** | **0.84** | **0.72** | **0.98** | **0.0269** |
| **less than once a month** | **-0.46** | **0.63** | **0.57** | **0.70** | **<0.001** |
| **never** | **-0.73** | **0.48** | **0.37** | **0.63** | **<0.001** |
| **Social relationships** | | | | | |
| **daily** | **-0.15** | **0.86** | **0.78** | **0.95** | **0.0035** |
| several times a week | -0.07 | 0.93 | 0.86 | 1.02 | 0.1257 |
| once a week | -0.02 | 0.98 | 0.89 | 1.09 | 0.7240 |
| several times a month | reference |  |  |  |  |
| **once a month** | **0.13** | **1.14** | **1.01** | **1.29** | **0.0297** |
| **less than once a month** | **0.11** | **1.11** | **1.01** | **1.22** | **0.0275** |
| **never meet with friends/family** | **0.28** | **1.33** | **1.06** | **1.66** | **0.0128** |

*Results of the multivariable ordinal logistic regression analysis identifying correlates of memory disorders frequency . OR: Odds Ratio; CI: Confidence Interval; p: p-value. **Bold text** indicates statistically significant predictors (p < 0.05). Reference categories for categorical independent variables are indicated as 'reference'.

**Table S4.** Logistic regression analysis of factors associated with diagnosed neurological disease*.

| **Trait** | **Estimate** | **OR** | **Lower 95 CI OR** | **Upper 95 CI OR** | ***p*** |
| --- | --- | --- | --- | --- | --- |
| **Neurological disease** | | | | | |
| Intercept | -5.85 | - | - | - | - |
| **Gender** | | | | | |
| females | reference |  |  |  |  |
| males | -0.13 | 0.88 | 0.76 | 1.02 | 0.0888 |
| **Age [y]** | **0.01** | **1.01** | **1.00** | **1.01** | **0.0200** |
| **Body height [cm]** | **0.03** | **1.03** | **1.00** | **1.05** | **0.0289** |
| **Body mass [kg]** | **-0.03** | **0.97** | **0.95** | **1.00** | **0.0310** |
| BMI [kg/m2] | 0.06 | 1.07 | 1.00 | 1.14 | 0.0668 |
| **Place of residence** | | | | | |
| rural | -0.12 | 0.89 | 0.76 | 1.03 | 0.1249 |
| **city up to 19000 citizens** | **-0.18** | **0.84** | **0.71** | **0.99** | **0.0400** |
| city 20-49000 citizens | -0.09 | 0.92 | 0.79 | 1.07 | 0.2779 |
| city 50-99000 citizens | reference |  |  |  |  |
| city 100-199000 citizens | -0.15 | 0.86 | 0.73 | 1.03 | 0.0942 |
| city 200-499000 citizens | -0.11 | 0.89 | 0.75 | 1.06 | 0.2040 |
| **city 500000 or more citizens** | **-0.31** | **0.73** | **0.62** | **0.87** | **0.0013** |
| **Education level** | | | | | |
| primary | 0.18 | 1.20 | 0.93 | 1.55 | 0.1643 |
| lower secondary | -0.43 | 0.65 | 0.41 | 1.05 | 0.0761 |
| basic vocational | 0.13 | 1.14 | 1.00 | 1.30 | 0.0554 |
| secondary | reference |  |  |  |  |
| post-secondary | -0.13 | 0.88 | 0.76 | 1.02 | 0.0871 |
| **higher (bachelor/engineer)** | **-0.34** | **0.71** | **0.60** | **0.85** | **0.0012** |
| **higher (master)** | **-0.31** | **0.73** | **0.65** | **0.83** | **<0.001** |
| **Matrimonial status** | | | | | |
| **single** | **0.18** | **1.20** | **1.04** | **1.38** | **0.0129** |
| in a stable relationship | reference |  |  |  |  |
| married | -0.05 | 0.95 | 0.84 | 1.08 | 0.4429 |
| widowed | -0.13 | 0.87 | 0.73 | 1.05 | 0.1482 |
| **other** | **0.40** | **1.49** | **1.15** | **1.92** | **0.0023** |
| **Profesisonal status** | | | | | |
| **employed under an employment contract or running your own business** | **-0.34** | **0.71** | **0.59** | **0.86** | **0.0014** |
| **employed under another contract (mandate contract, contract for specific work)** | **-0.45** | **0.64** | **0.50** | **0.82** | **0.0015** |
| **running a farm** | **-0.61** | **0.54** | **0.32** | **0.94** | **0.0276** |
| pensioner | reference |  |  |  |  |
| unemployed with the right to benefits | 0.18 | 1.20 | 0.86 | 1.68 | 0.2918 |
| **unemployed without the right to benefits** | **-0.28** | **0.76** | **0.59** | **0.97** | **0.0284** |
| **not working/studying** | **-0.42** | **0.65** | **0.47** | **0.91** | **0.0127** |
| **Work type** | | | | | |
| **physically heavy (at least 50% of working time)** | **0.16** | **1.18** | **1.02** | **1.36** | **0.0288** |
| sedentary (at least 50% of working time) | reference |  |  |  |  |
| other (none of above-mentioned) | -0.04 | 0.96 | 0.83 | 1.11 | 0.6014 |
| n/a | 0.03 | 1.03 | 0.87 | 1.23 | 0.7019 |
| **Neuroatypicality** | | | | | |
| autism spectrum | 0.18 | 1.19 | 0.70 | 2.03 | 0.5132 |
| Tourettes syndrome | 0.65 | 1.92 | 0.42 | 8.74 | 0.3989 |
| ADHD | -0.24 | 0.79 | 0.54 | 1.14 | 0.2056 |
| dyslexia (including dysorthography, dyscalculia or dysgraphia) | reference |  |  |  |  |
| OCD | -0.17 | 0.84 | 0.57 | 1.25 | 0.3901 |
| **another type of neuroatypicality** | **0.40** | **1.49** | **1.10** | **2.03** | **0.0105** |
| **I am neuroatypical** | **-0.56** | **0.57** | **0.44** | **0.74** | **<0.001** |
| **I don't know what neurotypical and/or neuroatypical means** | **-0.32** | **0.73** | **0.57** | **0.93** | **0.0108** |
| **Chronic diseases** | | | | | |
| **yes** | **1.18** | **3.26** | **2.89** | **3.69** | **<0.001** |
| no | reference |  |  |  |  |
| **Hypertension** | | | | | |
| yes | 0.03 | 1.03 | 0.93 | 1.14 | 0.5547 |
| no | reference |  |  |  |  |
| **Diabetes** | | | | | |
| yes | 0.07 | 1.07 | 0.94 | 1.22 | 0.3057 |
| no | reference |  |  |  |  |
| **Heart diseases** | | | | | |
| **yes** | **0.38** | **1.46** | **1.31** | **1.63** | **<0.001** |
| no | reference |  |  |  |  |
| **Chronic obstructive pulmonary disease (COPD)** | | | | | |
| yes | -0.01 | 0.99 | 0.84 | 1.16 | 0.8725 |
| no | reference |  |  |  |  |
| **Allergy or asthma** | | | | | |
| **yes** | **0.34** | **1.40** | **1.27** | **1.55** | **<0.001** |
| no | reference |  |  |  |  |
| **Cancer** | | | | | |
| **yes** | **0.39** | **1.47** | **1.28** | **1.69** | **<0.001** |
| no | reference |  |  |  |  |
| **Arthritis** | | | | | |
| **yes** | **0.58** | **1.78** | **1.62** | **1.96** | **<0.001** |
| no | reference |  |  |  |  |
| **COVID-19** | | | | | |
| yes | 0.06 | 1.06 | 0.97 | 1.17 | 0.1833 |
| no | reference |  |  |  |  |
| **Smoking (conventional tobacco products)** | | | | | |
| yes, daily or almost daily | -0.001 | 1.00 | 0.89 | 1.12 | 0.9831 |
| yes, occasionally | reference |  |  |  |  |
| no, but i have smoked in the past | -0.13 | 0.88 | 0.73 | 1.06 | 0.1703 |
| no, never | -0.13 | 0.87 | 0.69 | 1.12 | 0.2817 |
| **Smoking (heated tobacco)** | | | | | |
| **yes, daily or almost daily** | **-0.26** | **0.77** | **0.61** | **0.98** | **0.0344** |
| yes, occasionally | reference |  |  |  |  |
| no, but i have smoked in the past | -0.19 | 0.83 | 0.64 | 1.07 | 0.1482 |
| **no, never** | **-0.28** | **0.75** | **0.62** | **0.91** | **0.0039** |
| **Smoking (e-cigarette, liquids)** | | | | | |
| yes, daily or almost daily | -0.22 | 0.81 | 0.64 | 1.01 | 0.0624 |
| yes, occasionally | reference |  |  |  |  |
| no, but i have smoked in the past | -0.09 | 0.91 | 0.74 | 1.11 | 0.3639 |
| **no, never** | **-0.17** | **0.84** | **0.71** | **1.00** | **0.0487** |
| **Alcohol drinking** | | | | | |
| two or more drinks a day | -0.16 | 0.85 | 0.66 | 1.10 | 0.2113 |
| about one drink a day | -0.21 | 0.81 | 0.65 | 1.01 | 0.0638 |
| two or three drinks a week | -0.12 | 0.89 | 0.77 | 1.03 | 0.1055 |
| two or three drinks a month | reference |  |  |  |  |
| one drink a month or less | 0.02 | 1.02 | 0.90 | 1.14 | 0.7879 |
| **Drinking (beer)** | | | | | |
| yes, every day | -0.05 | 0.95 | 0.75 | 1.20 | 0.6558 |
| yes, several times a week | -0.004 | 1.00 | 0.83 | 1.20 | 0.9660 |
| yes, several times a month | reference |  |  |  |  |
| yes, once a month or less often | -0.02 | 0.98 | 0.86 | 1.11 | 0.7767 |
| no, never | -0.12 | 0.89 | 0.77 | 1.02 | 0.0961 |
| **Drinking (wine)** | | | | | |
| yes, every day | -0.37 | 0.69 | 0.44 | 1.10 | 0.1156 |
| yes, several times a week | -0.12 | 0.89 | 0.67 | 1.18 | 0.4177 |
| yes, several times a month | reference |  |  |  |  |
| yes, once a month or less often | 0.02 | 1.02 | 0.88 | 1.19 | 0.7778 |
| no, never | -0.06 | 0.95 | 0.81 | 1.11 | 0.4849 |
| **Drinking (vodka)** | | | | | |
| yes, every day | -0.03 | 0.97 | 0.65 | 1.45 | 0.8810 |
| yes, several times a week | 0.03 | 1.03 | 0.79 | 1.35 | 0.8357 |
| yes, several times a month | reference |  |  |  |  |
| yes, once a month or less often | -0.03 | 0.97 | 0.83 | 1.12 | 0.6712 |
| no, never | -0.09 | 0.91 | 0.78 | 1.07 | 0.2768 |
| **Drinking (other alcohols)** | | | | | |
| yes, every day | -0.03 | 0.97 | 0.58 | 1.64 | 0.9196 |
| yes, several times a week | 0.11 | 1.11 | 0.78 | 1.59 | 0.5542 |
| yes, several times a month | reference |  |  |  |  |
| yes, once a month or less often | 0.07 | 1.08 | 0.89 | 1.30 | 0.4438 |
| no, never | 0.07 | 1.07 | 0.89 | 1.29 | 0.4445 |
| **Most frequently consumed meals** | | | | | |
| balanced according to the food pyramid | -0.10 | 0.91 | 0.57 | 1.44 | 0.6747 |
| vegetarian | -0.21 | 0.81 | 0.49 | 1.35 | 0.4153 |
| vegan | -0.04 | 0.96 | 0.38 | 2.41 | 0.9302 |
| meat | -0.14 | 0.87 | 0.55 | 1.37 | 0.5372 |
| gluten-free | reference |  |  |  |  |
| dairy-free | 0.06 | 1.06 | 0.56 | 2.02 | 0.8552 |
| with limited carbohydrates (no potatoes, rice, pasta, etc,) | -0.20 | 0.82 | 0.51 | 1.34 | 0.4288 |
| with reduced sodium (table salt) content | -0.05 | 0.95 | 0.59 | 1.53 | 0.8271 |
| other type of meals - what type? | -0.23 | 0.80 | 0.48 | 1.32 | 0.3782 |
| don't know/hard to say | -0.06 | 0.94 | 0.59 | 1.48 | 0.7802 |
| **Eating fast food** | | | | | |
| daily | 0.42 | 1.53 | 0.64 | 3.65 | 0.3428 |
| several times a week | -0.13 | 0.87 | 0.61 | 1.25 | 0.4650 |
| once a week | -0.03 | 0.98 | 0.75 | 1.26 | 0.8481 |
| several times a month | reference |  |  |  |  |
| once a month | -0.10 | 0.90 | 0.76 | 1.07 | 0.2328 |
| less than once a month | -0.05 | 0.95 | 0.82 | 1.10 | 0.4679 |
| never eat such products | -0.05 | 0.95 | 0.79 | 1.14 | 0.5769 |
| **Eating vegetables** | | | | | |
| **daily** | **-0.21** | **0.81** | **0.69** | **0.95** | **0.0111** |
| **several times a week** | **-0.17** | **0.84** | **0.73** | **0.97** | **0.0211** |
| once a week | -0.07 | 0.93 | 0.77 | 1.13 | 0.4495 |
| several times a month | reference |  |  |  |  |
| once a month | -0.20 | 0.82 | 0.58 | 1.14 | 0.2348 |
| less than once a month | 0.04 | 1.04 | 0.79 | 1.37 | 0.7629 |
| never eat vegetables | -0.44 | 0.64 | 0.32 | 1.27 | 0.2015 |
| **Eating fruits** | | | | | |
| daily | -0.08 | 0.92 | 0.78 | 1.08 | 0.3084 |
| several times a week | -0.004 | 1.00 | 0.86 | 1.15 | 0.9607 |
| **once a week** | **-0.25** | **0.78** | **0.64** | **0.94** | **0.0097** |
| several times a month | reference |  |  |  |  |
| once a month | -0.05 | 0.95 | 0.72 | 1.27 | 0.7394 |
| less than once a month | -0.11 | 0.90 | 0.70 | 1.15 | 0.3831 |
| never eat vegetables | 0.02 | 1.02 | 0.61 | 1.68 | 0.9479 |
| **Sporting activity** | | | | | |
| **at least 2 hours per week or more** | **-0.18** | **0.84** | **0.70** | **0.99** | **0.0435** |
| approximately 1-1,5 hours per week | -0.03 | 0.97 | 0.81 | 1.16 | 0.7200 |
| less than 4 hours per month | reference |  |  |  |  |
| don't do any sports | 0.01 | 1.01 | 0.88 | 1.17 | 0.8600 |
| **Stress level** | | | | | |
| **daily** | **0.30** | **1.35** | **1.18** | **1.55** | **<0.001** |
| **several times a week** | **0.19** | **1.20** | **1.06** | **1.37** | **0.0042** |
| once a week | 0.08 | 1.08 | 0.87 | 1.34 | 0.4906 |
| several times a month | reference |  |  |  |  |
| once a month | -0.13 | 0.88 | 0.70 | 1.10 | 0.2664 |
| **less than once a month** | **-0.28** | **0.76** | **0.65** | **0.88** | **0.0014** |
| never | -0.21 | 0.81 | 0.57 | 1.16 | 0.2515 |
| **Social relationships** | | | | | |
| daily | -0.11 | 0.90 | 0.77 | 1.05 | 0.1711 |
| several times a week | -0.06 | 0.94 | 0.83 | 1.07 | 0.3736 |
| once a week | -0.06 | 0.95 | 0.81 | 1.10 | 0.4659 |
| several times a month | reference |  |  |  |  |
| once a month | 0.09 | 1.09 | 0.92 | 1.30 | 0.3250 |
| less than once a month | 0.02 | 1.02 | 0.90 | 1.17 | 0.7216 |
| **never meet with friends/family** | **0.33** | **1.39** | **1.05** | **1.86** | **0.0235** |

*Results of the multivariable binary logistic regression analysis identifying correlates of diagnosed neurological disease. OR: Odds Ratio; CI: Confidence Interval; p: p-value. **Bold text** indicates statistically significant predictors (p < 0.05). Reference categories for categorical independent variables are indicated as 'reference'.

**Table S5.** Euclidean distances matrix of mental health aspects for total sample.

|  | | **General health assessment** | | --- | | | **Headache** | | --- | | | **Insomnia** | | --- | | | **Memory disorders** | | --- | | | **Job burnout** | | --- | | | **Depression** | | --- | | | **Neurologicial diseases** | | --- | |
| --- | --- | --- | --- | --- | --- | --- | --- | --- | --- | --- | --- | --- | --- | --- |
| | **General health assessment** | | --- | | 0 | 1409 | 1485 | 1427 | 1584 | 1251 | 1154 |
| | **Headache** | | --- | | 1409 | 0 | 993 | 1043 | 916 | 829 | 823 |
| | **Insomnia** | | --- | | 1485 | 993 | 0 | 1031 | 1019 | 913 | 919 |
| | **Memory disorders** | | --- | | 1427 | 1043 | 1031 | 0 | 1053 | 1034 | 1025 |
| | **Job burnout** | | --- | | 1584 | 916 | 1019 | 1053 | 0 | 855 | 905 |
| | **Depression** | | --- | | 1251 | 829 | 913 | 1034 | 855 | 0 | 465 |
| | **Neurological diseases** | | --- | | 1154 | 823 | 919 | 1025 | 905 | 465 | 0 |

**Table S6.** Euclidean distances matrix of mental health aspects for females group.

|  | | **General health assessment** | | --- | | | **Headache** | | --- | | | **Insomnia** | | --- | | | **Memory disorders** | | --- | | | **Job burnout** | | --- | | | **Depression** | | --- | | | **Neurological diseases** | | --- | |
| --- | --- | --- | --- | --- | --- | --- | --- | --- | --- | --- | --- | --- | --- | --- |
| | **General health assessment** | | --- | | 0 | 1099 | 1148 | 1088 | 1237 | 1011 | 923 |
| | **Headache** | | --- | | 1099 | 0 | 781 | 854 | 707 | 605 | 592 |
| | **Insomnia** | | --- | | 1148 | 781 | 0 | 832 | 803 | 688 | 685 |
| | **Memory disorders** | | --- | | 1088 | 854 | 832 | 0 | 839 | 795 | 780 |
| | **Job burnout** | | --- | | 1237 | 707 | 803 | 839 | 0 | 643 | 678 |
| | **Depression** | | --- | | 1011 | 605 | 688 | 795 | 643 | 0 | 382 |
| | **Neurological diseases** | | --- | | 923 | 592 | 685 | 780 | 678 | 382 | 0 |

**Table S7.** Euclidean distances matrix of mental health aspects for males group.

|  | | **General health assessment** | | --- | | | **Headache** | | --- | | | **Insomnia** | | --- | | | **Memory disorders** | | --- | | | **Job burnout** | | --- | | | **Depression** | | --- | | | **Neurological diseases** | | --- | |
| --- | --- | --- | --- | --- | --- | --- | --- | --- | --- | --- | --- | --- | --- | --- |
| | **General health assessment** | | --- | | 0 | 881 | 942 | 924 | 990 | 736 | 694 |
| | **Headache** | | --- | | 881 | 0 | 614 | 600 | 583 | 566 | 572 |
| | **Insomnia** | | --- | | 942 | 614 | 0 | 609 | 626 | 600 | 613 |
| | **Memory disorders** | | --- | | 924 | 600 | 609 | 0 | 637 | 662 | 665 |
| | **Job burnout** | | --- | | 990 | 583 | 626 | 637 | 0 | 564 | 599 |
| | **Depression** | | --- | | 736 | 566 | 600 | 662 | 564 | 0 | 266 |
| | **Neurological diseases** | | --- | | 694 | 572 | 613 | 665 | 599 | 266 | 0 |

**Supplementary Figures**


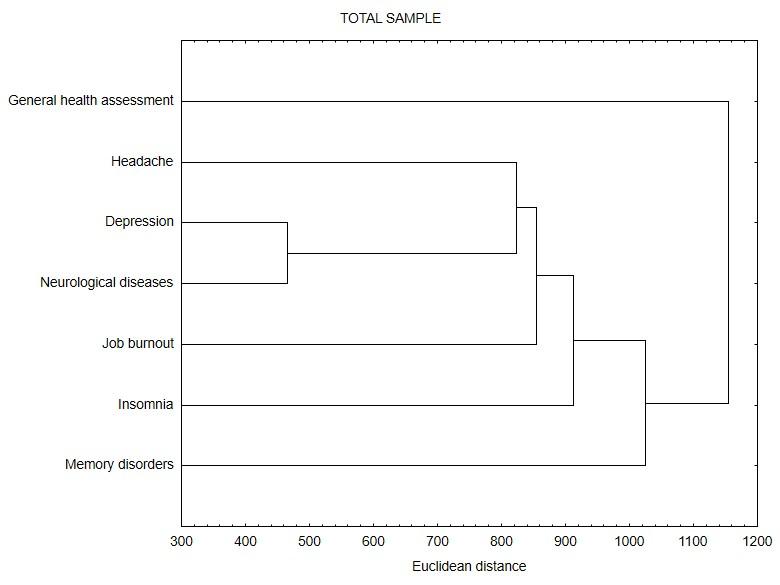


**Fig. S1.** Euclidean distances of mental health aspects in total sample

**
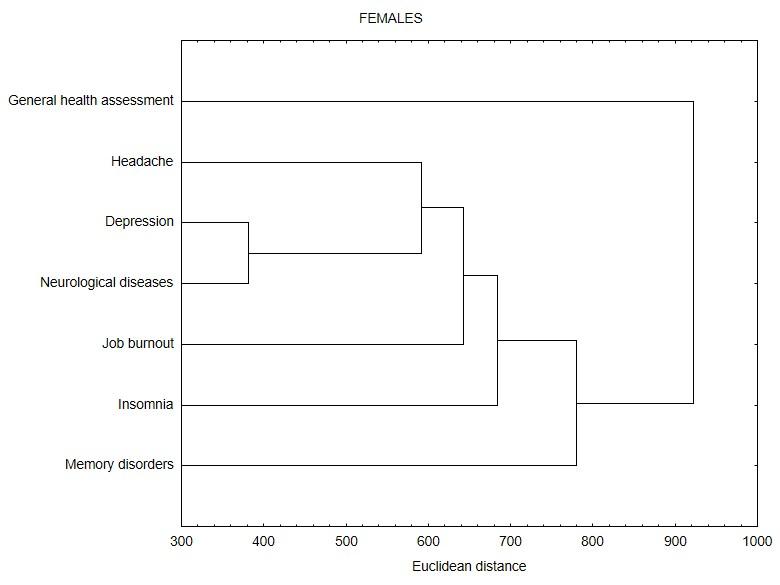
**

**Fig. S2.** Euclidean distances of mental health aspects in females groups


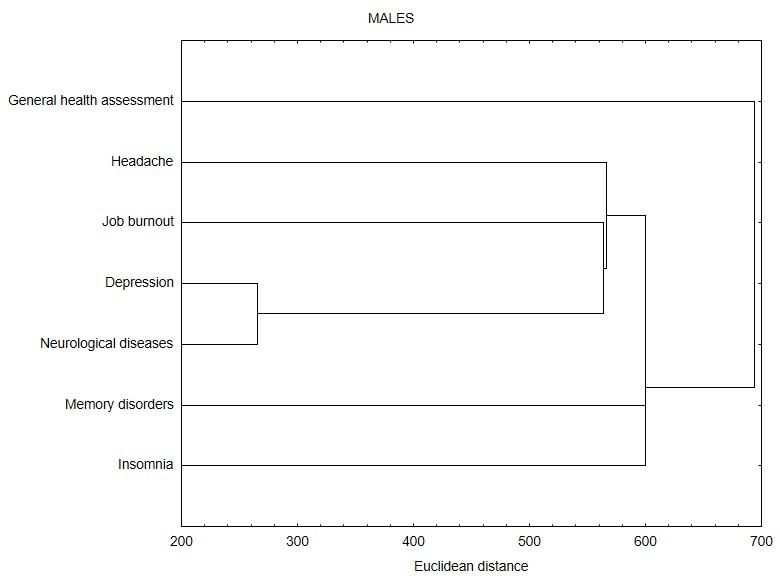


**Fig. S3.** Euclidean distances of mental health aspects in males’ group.
